# Supplementary material
Source: publisher figshare collection journal article supplement (https://frontiersin.figshare.com/ndownloader/files/28711518)
Supplement: Supplementary file [file 28711518]

**A**

## Expression per Unsupervised Cluster Identified

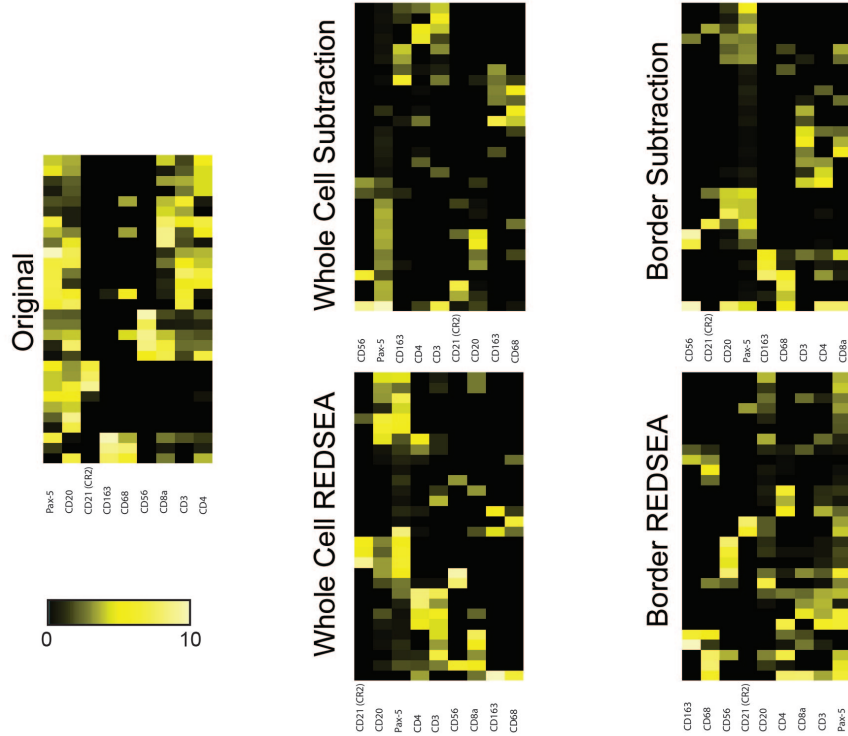

**B**

## Quantification of Cell Types Annotated in a Single Iteration

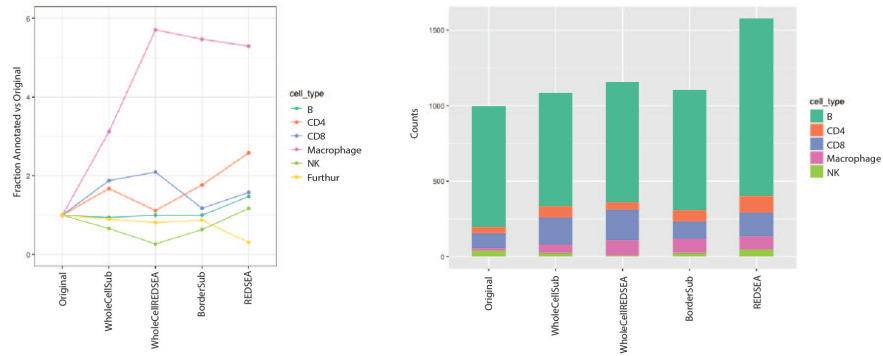

**C**

## Accuracy and Sensitivity of Cell Type Identification based on Manual Annotation

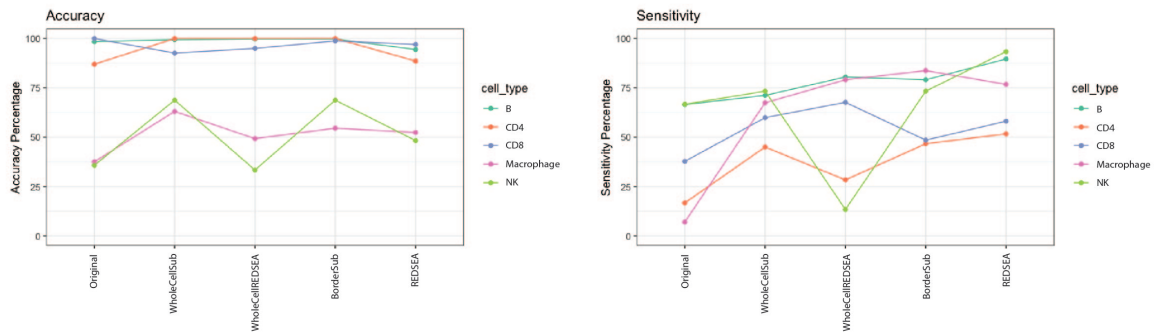

**Figure S4: Related to Figure 4. (A)** Marker Enrichment Modeling expression of each marker for each of the 30 clusters identified via FlowSOM, under the original (left) or each of the 4 compensation methods as denoted (middle and right). All clustering was performed independently for each condition, but with identical parameters. **(B)** Quantification of the number of cells for each cell type successfully annotated under each compensation condition, as represented by fold-change over cells annotated in the original condition (left) or as a cumulative plot (right). **(C)** The sensitivity (left) and accuracy (right) of cell-type identification under each compensation condition based on a manual consensus annotation from three independent individuals.

D

## Median Marker Expression per Cell Type

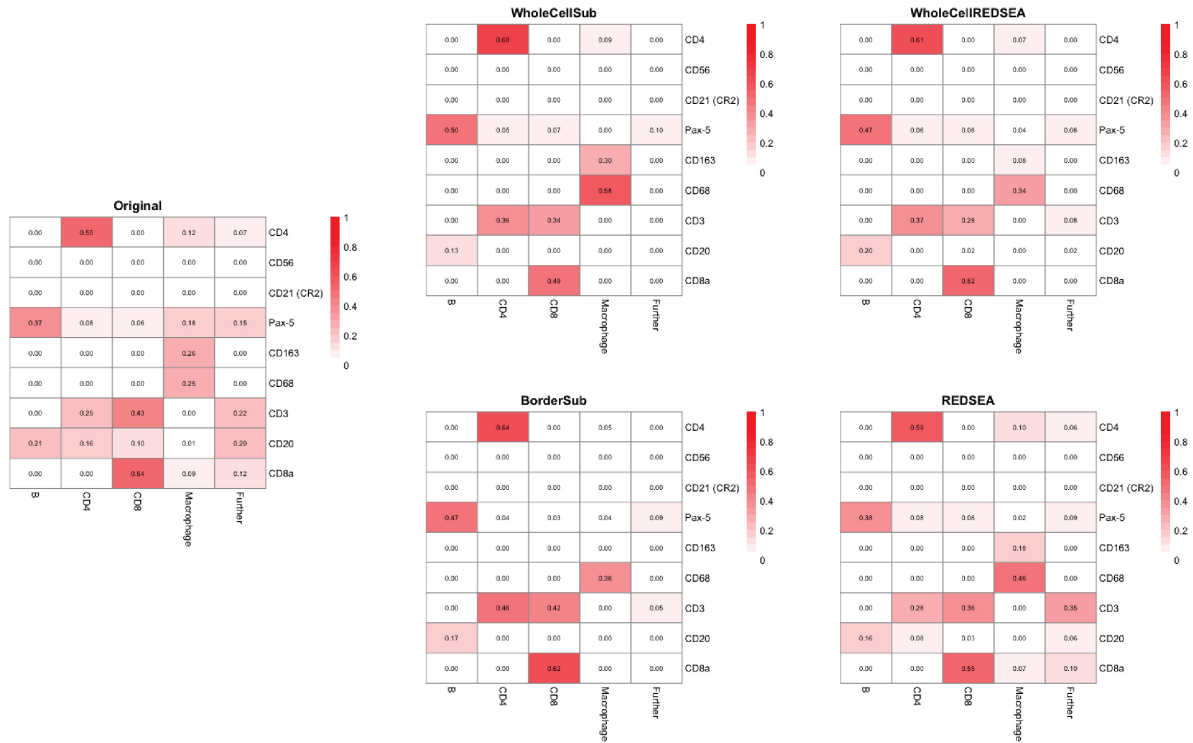

E

## Phenotype Maps of Cell Types Identified

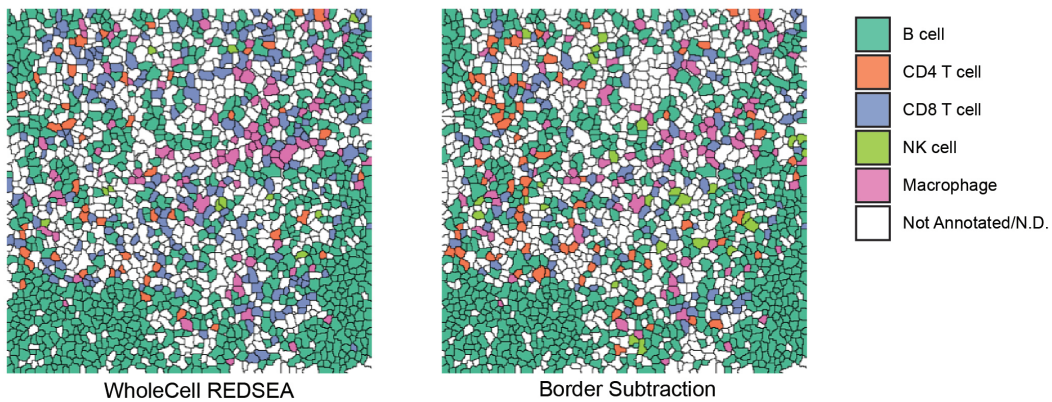

**Figure S4 (cont.): Related to Figure 4. (D)** The median marker expression of cell types identified under each condition colored according to a 0-1 (min-max) scale. **(E)** Phenotype maps obtained after Whole Cell REDSEA correction and Border Subtraction correction.
